# Supplementary material for: Formation of monolayer and few-layer hexagonal boron nitride nanosheets via surface segregation
Source: Royal Society of Chemistry journal article supplement (doi:10.1039/c1nr10294j), 2011-01-01
Supplement: c1nr10294j.pdf [file c1nr10294j.pdf]

## Electronic Supplementary Information

Formation of monolayer and few-layer hexagonal boron nitride nanosheets *via* surface  
segregation

Mingsheng Xu <sup>1,2,\*</sup>, Daisuke Fujita <sup>3,4</sup>, Hongzheng Chen <sup>1</sup>, Nobutaka Hanagata <sup>5,6</sup>

<sup>1</sup> State Key Laboratory of Silicon Materials, MOE Key Laboratory of Macromolecule Synthesis and Functionalization, and Department of Polymer Science and Engineering, Zhejiang University, Hangzhou 310027, P. R. China

<sup>2</sup> International Center for Young Scientists, National Institute for Materials Science, 1-2-1 Sengen, Tsukuba, Ibaraki 305-0047, Japan

<sup>3</sup> Advanced Nano Characterization Center, National Institute for Materials Science, 1-2-1 Sengen, Tsukuba, Ibaraki 305-0047, Japan

<sup>4</sup> International Center for Materials Nanoarchitectonics, National Institute for Materials Science, 1-2-1 Sengen, Tsukuba, Ibaraki 305-0047, Japan

<sup>5</sup> Interdisciplinary Laboratory for Nanoscale Science and Technology, National Institute for Materials Science, 1-2-1 Sengen, Tsukuba, Ibaraki 305-0047, Japan

<sup>6</sup> Graduate School of Life Science, Hokkaido University, Sapporo, Japan

\*Corresponding author: msxu@zju.edu.cn (Mingsheng Xu)

### Thickness estimation

| Fe (LMM) transition    | Substrate (sputtered for 0.4 min) | Buffer layer | Monolayer stack | Bilayer stack |
|------------------------|-----------------------------------|--------------|-----------------|---------------|
| Peak-to-peak magnitude | 10695                             | 7237         | 4871            | 3441          |
| Thickness              |                                   | 0.31 nm      | 0.65 nm         | 0.91 nm       |

To estimate the thickness of h-BN films, we used Fe (LMM) Auger transition with the electron inelastic mean free path of  $\sim 1.2$  nm for iron at  $\sim 703$  eV based on inelastic attenuation model of the following expression. By considering the carbon contamination, we used the peak-to-peak magnitude of Fe (LMM) transition from the AES spectra after sputtered for 0.4 min as the  $I_{\text{sub, pure}}$ . However, we used the peak-to-peak magnitude of Fe (LMM) transition from the AES spectra without sputtering as  $I_{\text{sub}}$  because argon ion sputtering can damage the structure of h-BN and the buffer layer, and the carbon contamination at the buffer layer and h-BN regions is much less than at the bare substrate surface.

$$I_{\text{sub}} = I_{\text{sub, pure}} \exp[-(nd_0)/\lambda \sin(\theta)]$$

where  $I_{\text{sub}}$  is the peak-to-peak magnitude of the Fe (LMM) transition prior to sputtering by ion-gun sputtering,  $I_{\text{sub, pure}}$  is the peak-to-peak magnitude of the Fe (LMM) peak after removing most of the carbon contamination (*i.e.*, 0.4 min sputtering time),  $n$  is the number of h-BN,  $d_0$  is the theoretical thickness of single h-BN sheet ( $\sim 3.4$  Å),  $\theta$  is the electron take-off angle ( $42^\circ$  for the present Auger instrument), and  $\lambda$  is the inelastic mean free path (IMFP) of the Auger electrons for iron.

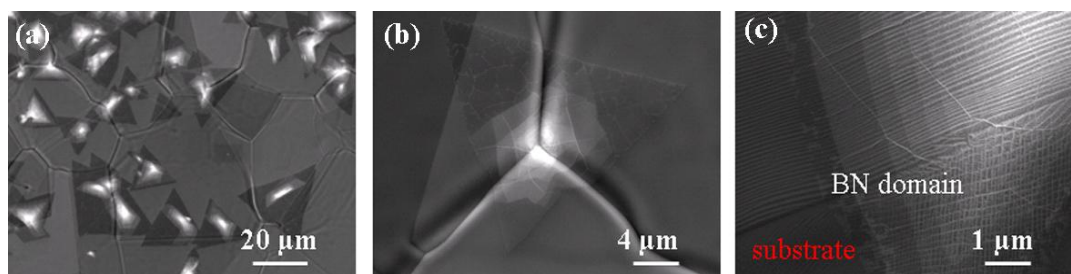

Figure S1. Typical SEM images of h-BN nanosheets synthesized by surface segregation from Fe-Cr-Ni alloy doped with boron and nitrogen.

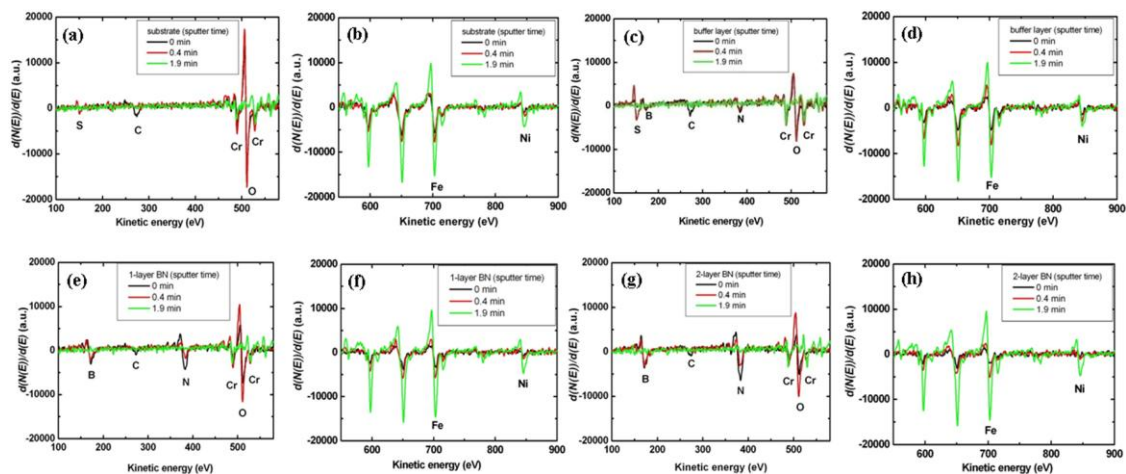

Figure S2. AES spectra show elemental evolution as a function of sputtering time, acquired at (a)-(b) substrate region, (c)-(d) B-N buffer layer region, (e)-(f) monolayer h-BN region, and (g)-(h) bilayer h-BN region of the sample in Figure S3.

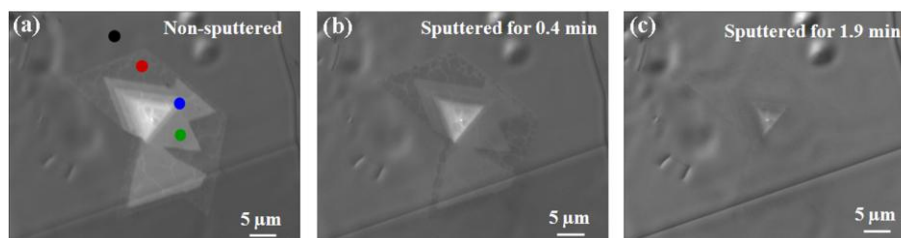

Figure S3. SEM images of h-BN flakes acquired before and after sputtered for different times. The black, red, blue, and green spots represent the substrate, B-N buffer layer, monolayer h-BN, and bilayer h-BN, respectively.

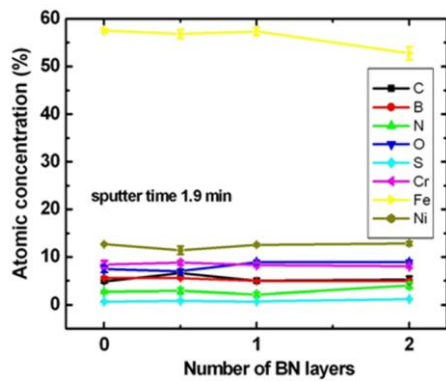

Figure S4. Atomic concentration of h-BN sample after sputtered for 1.9 min.
